# Supplementary material for: CCR5 Signaling Promotes Murine and Human Hematopoietic Regeneration following Ionizing Radiation
Source: PubMed Central journal article supplement — Stem Cell Reports. 2019 May 30;13(1):76–90. doi: 10.1016/j.stemcr.2019.04.023 (PMC6626871; doi:10.1016/j.stemcr.2019.04.023), 2019-05-30
Supplement: mmc1.pdf [file mmc1.pdf]

**Stem Cell Reports, Volume 13**

**Supplemental Information**

**CCR5 Signaling Promotes Murine and Human Hematopoietic Regeneration following Ionizing Radiation**

**Sadhna O. Piryani, Angel Y.F. Kam, Uyen T. Vu, Nelson J. Chao, and Phuong L. Doan**

## SUPPLEMENTARY DATA

**Figure S1**

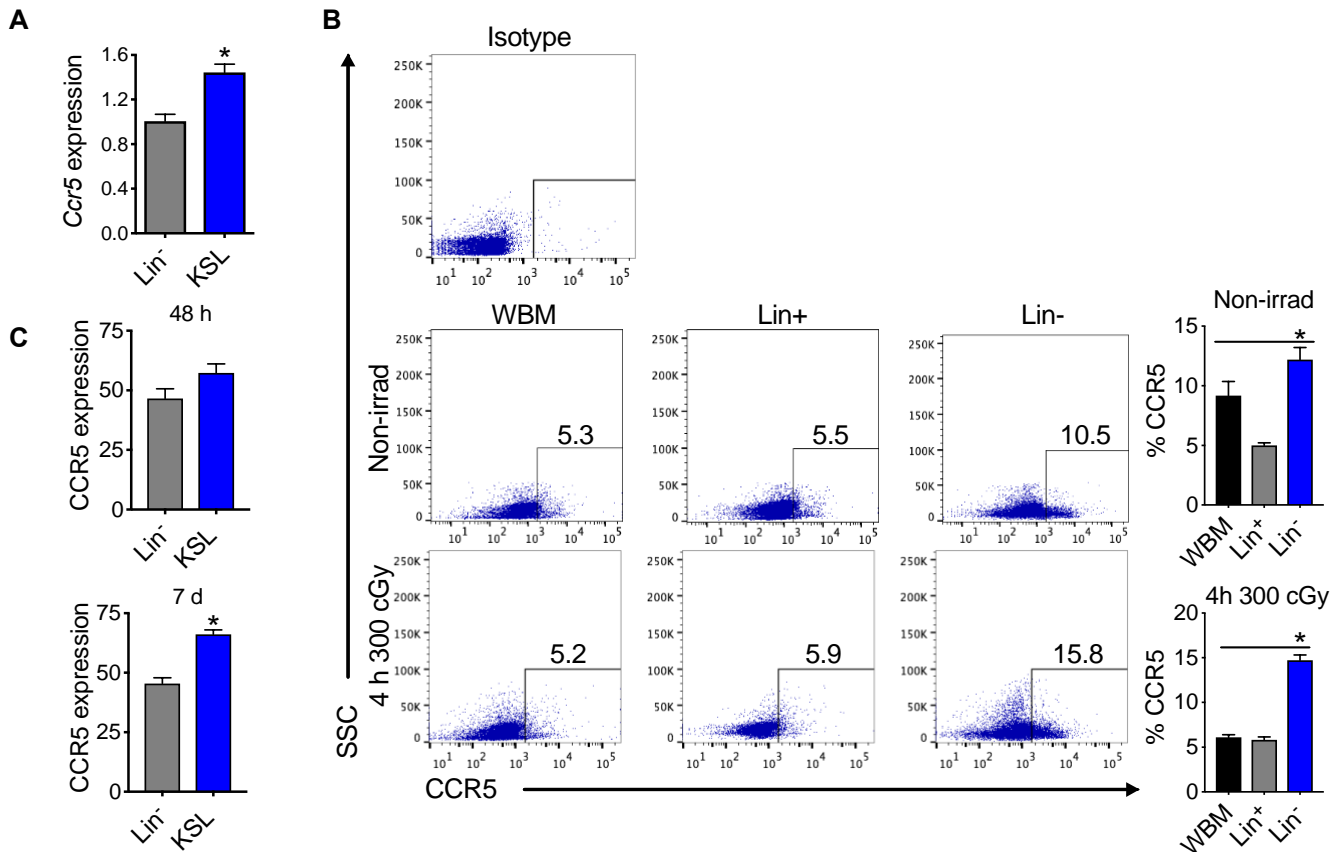

**Figure S1. CCR5 expression in hematopoietic cell subsets following irradiation. (A)** *Ccr5* mRNA expression of C57BL/6 KSL cells compared to Lin<sup>-</sup> cells at 2 h following 500 cGy.  $n=4$  per group,  $*p=0.004$ . **(B)** Representative flow cytometric analysis and quantification of CCR5 expression in subsets of non-irradiated hematopoietic cells and at 4 h following 300 cGy.  $n=5$  per group.  $*p=0.0004$  and  $<0.0001$  by Anova analysis for non-irradiated and irradiated comparisons, respectively. **(C)** Percentage of CCR5 by flow cytometric analysis in Lin<sup>-</sup> or KSL cells at 48 h and at 7 days following 300 cGy.  $n=6$  per group.  $*p<0.0001$  at 7 days, respectively. Student's t test (two-tailed with unequal variance) were used in these analyses, except as noted in **(B)**.

**Figure S2**

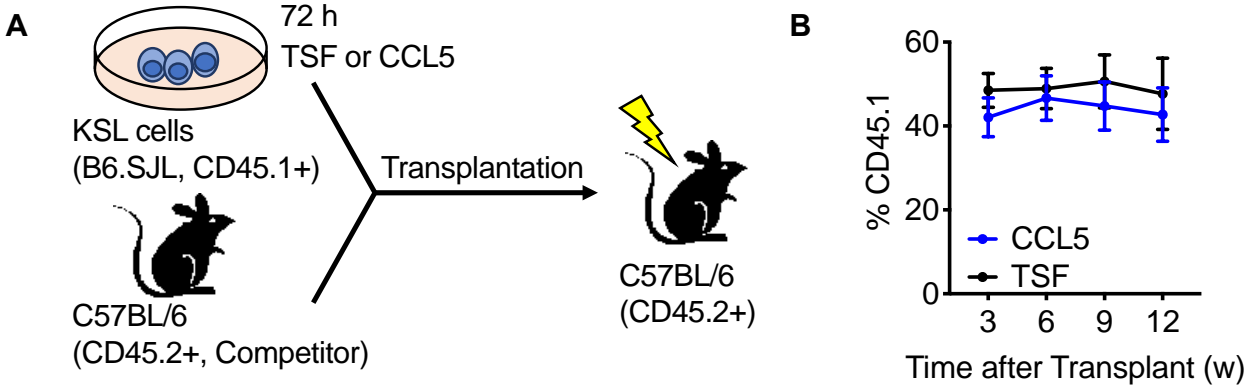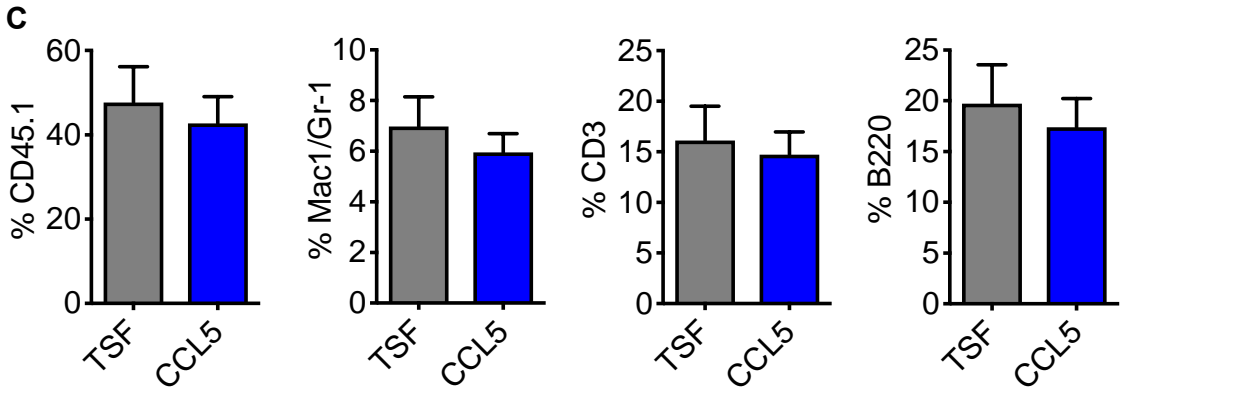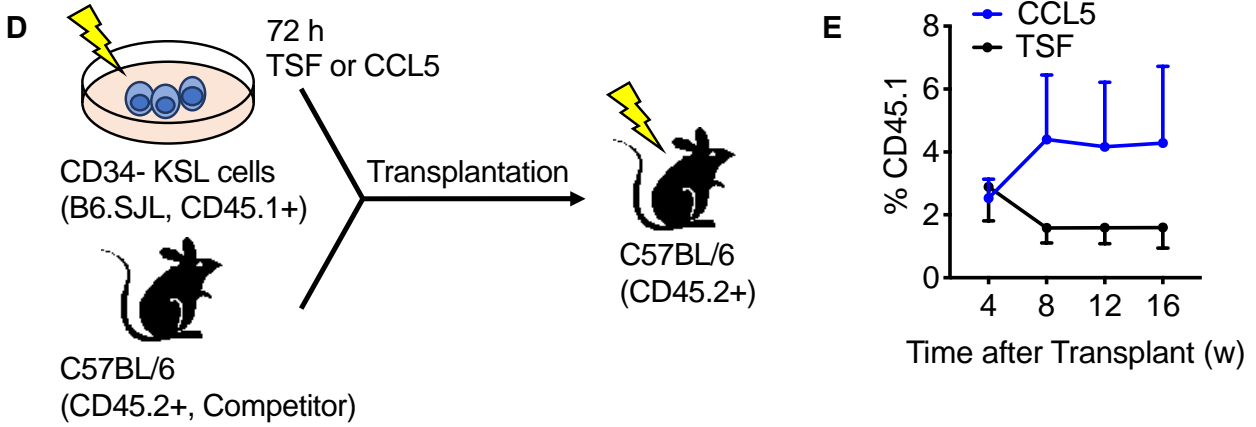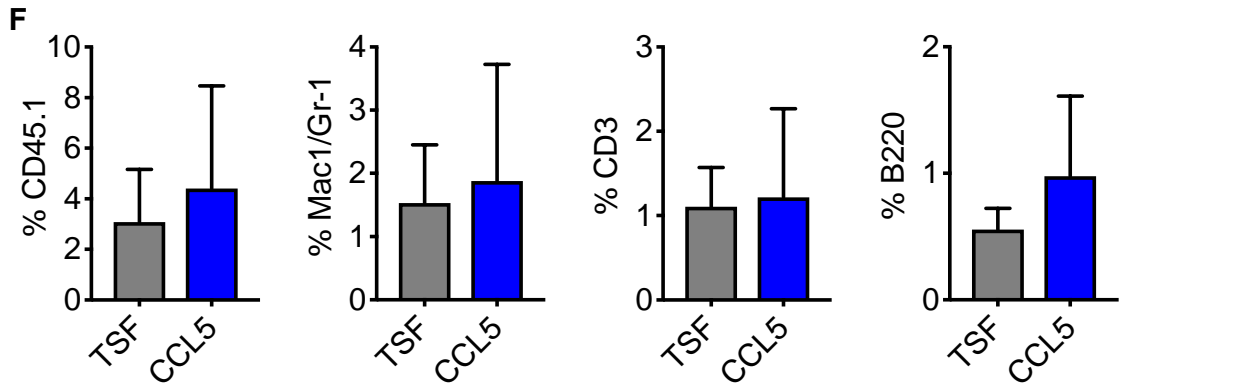

**Figure S2. Competitive transplantation following CCL5 treatment in vitro and in vivo. (A)**

Schematic diagram of competitive transplantation assay of non-irradiated KSL cells and progeny (B6.SJL, CD45.1+) cultured for 7 days with 30 ng/ml CCL5 and TSF or TSF alone. Recipient mice (C57BL/6, CD45.2+) were conditioned with 900 cGy total body irradiation and then transplanted with  $1.5 \times 10^3$  non-irradiated KSL cells and progeny along with  $2 \times 10^5$  competing host bone marrow (CD45.2+). **(B)** Total CD45.1 peripheral blood donor engraftment over time in recipient mice transplanted as outline in **(A)**. **(C)** Total and multi-lineage engraftment in the peripheral blood of recipient mice at 12 weeks following transplantation.  $n= 8-9$  mice per group. **(D)** Schematic diagram of study design for competitive transplantation following in vitro treatment with CCL5. CD34-KSL cells were isolated from B6.SJL donor mice (CD45.1) and irradiated with 300 cGy. One thousand CD34-KSL cells per well were cultured with either 30 ng/ml CCL5 + TSF or TSF alone. At 72 h, CD34-KSL cells and progeny were transplanted into lethally-irradiated (900-cGy) C57BL/6 recipient mice along with  $2 \times 10^5$  competing host bone marrow cells. One well of cultured cells was transplanted into 1 animal. Mice were followed for peripheral blood and marrow engraftment over time. **(E)** Total CD45.1 peripheral blood donor engraftment over time of recipient mice.  $n= 11-12$  mice per group. **(F)** Total and multi-lineage engraftment in the bone marrow of recipient mice at 16 weeks following transplantation. Student's t test (two-tailed with unequal variance) were used in these analyses. All comparisons were  $p > 0.05$ .

**Figure S3**

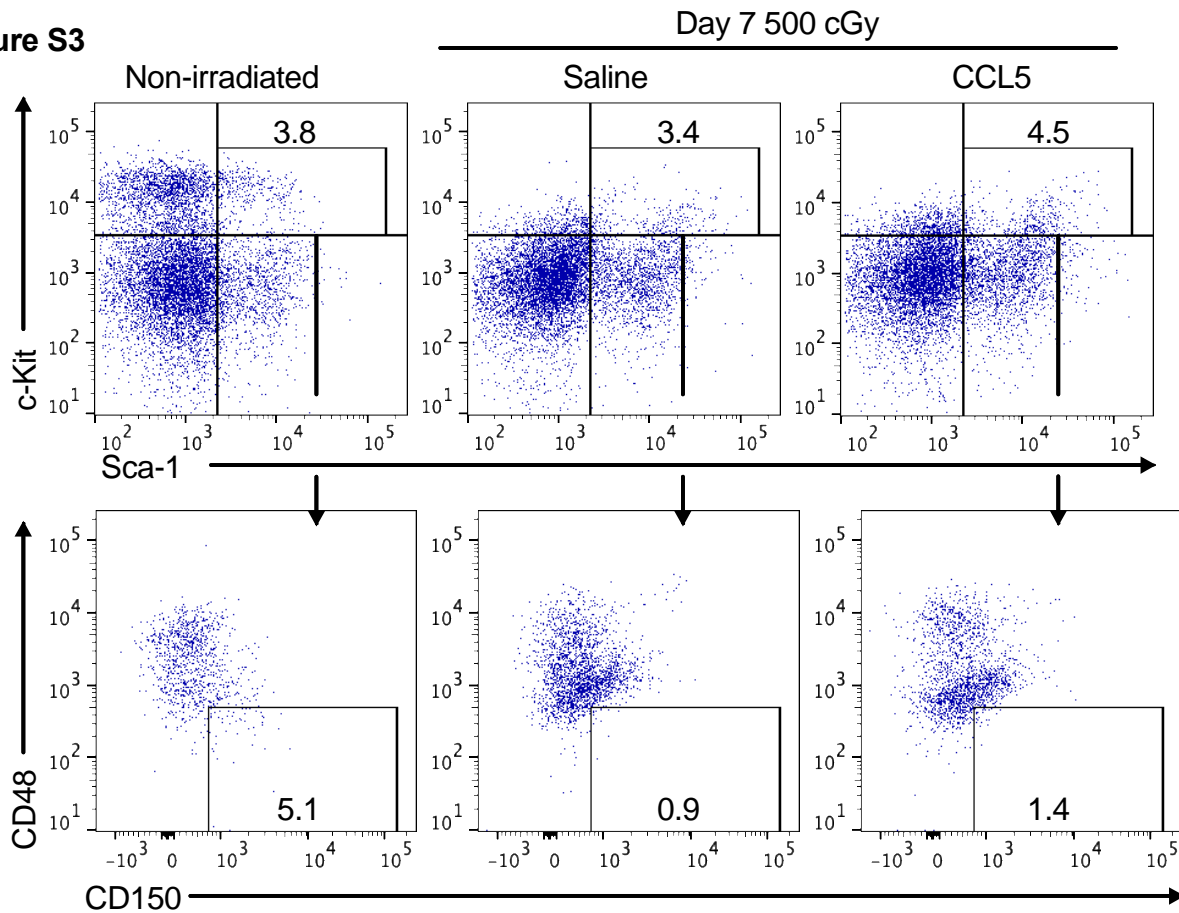

**Figure S3. Representative flow cytometric analysis for SLAMF6<sup>+</sup>KSL.** From Lineage- cells, ckit+Sca-1<sup>+</sup> cells are gated (top row). From this KSL gate, CD150<sup>+</sup>CD48<sup>-</sup> KSL cells are gated (bottom row).

**Figure S4**

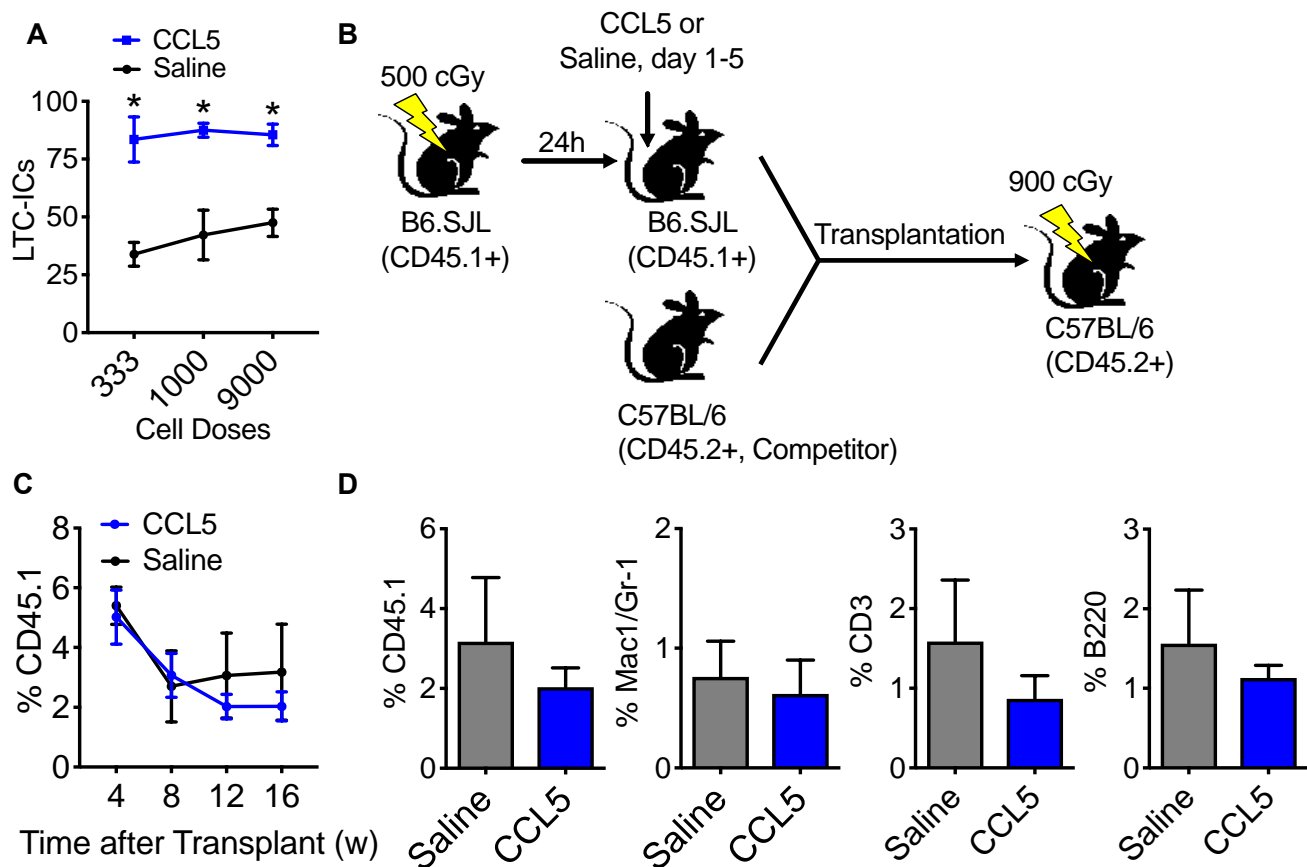

**Figure S4. HSC content in C57BL/6 mice following 500 cGy TBI and treatment with CCL5. (A)** Levels of long-term colony-initiating cells (LTC-ICs) on day 7 from whole bone marrow (WBM) of irradiated (500cGy) C57BL/6 mice treated with 0.1  $\mu\text{g}/\text{gram}$  body weight CCL5 or Saline subcutaneously starting 24 h after irradiation for 5 doses.  $n= 4-7$  per group. \* $p= 0.001, 0.002, \text{ and } 0.002$  for cell doses  $3.3 \times 10^2, 10^3, \text{ and } 9 \times 10^3$  respectively. **(B)** Schematic diagram of competitive transplantation of donor cells from irradiated (500 cGy) B6.SJL mice treated with 0.1  $\mu\text{g}/\text{gram}$  body weight CCL5 or Saline subcutaneously starting 24 h after irradiation for 5 doses. On day 7 post-irradiation,  $10^6$  donor cells and  $2 \times 10^5$  competing host cells are transplanted to irradiated (900 cGy) mice. **(C)** Total peripheral blood donor engraftment of recipient mice transplanted with CCL5- or Saline-treated donor mice.  $n= 8-10$  mice per group. **(D)** Total and multi-lineage engraftment in the bone marrow of recipient mice at 16 weeks following transplantation.  $n= 8-10$  mice per group. Student's t test

(two-tailed with unequal variance) were used in these analyses. All comparisons in Fig. S4C, D were  $p > 0.05$ .

**Figure S5**

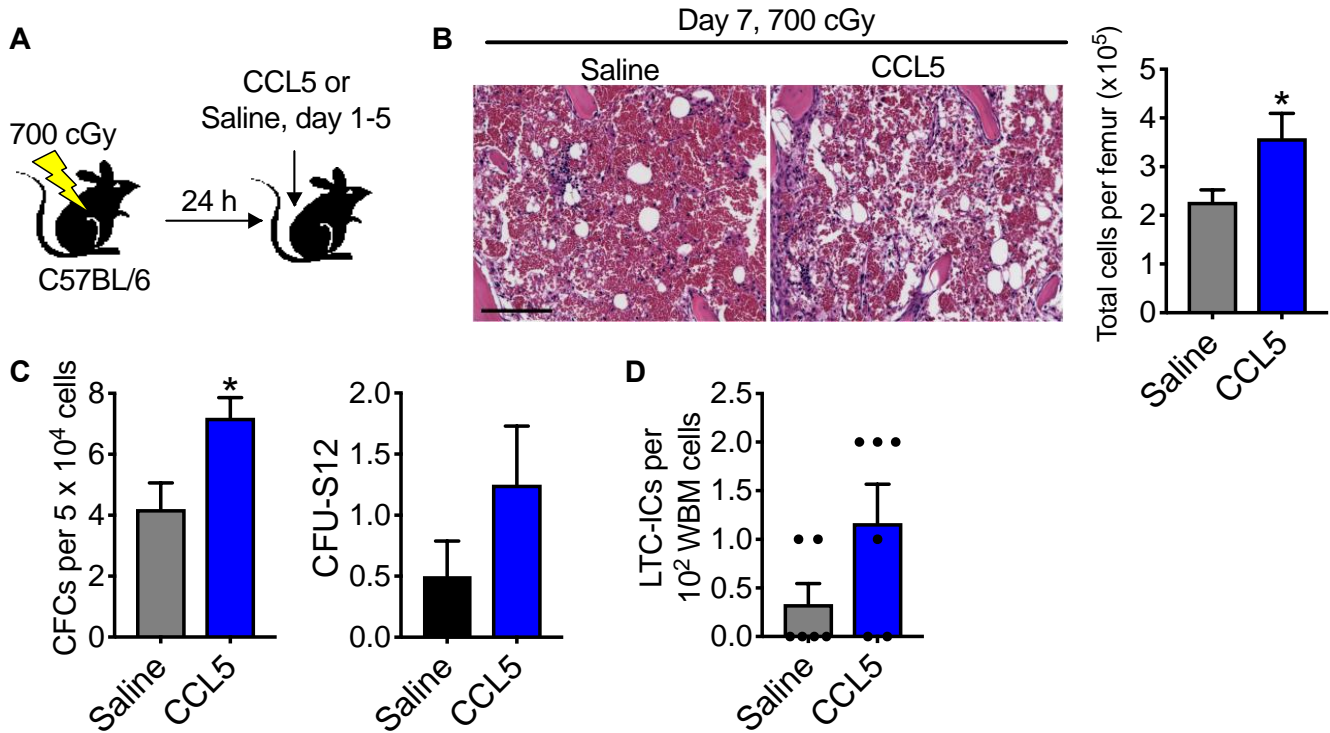

**Figure S5. HSPC content in C57BL/6 mice following 700 cGy TBI and treatment with CCL5.** (A) Schematic diagram of study design. Irradiated (700 cGy) C57BL/6 mice are treated with 0.1 μg/gram body weight CCL5 or Saline subcutaneously starting 24 h after irradiation for 5 doses. Hematopoietic stem/progenitor assays are performed on day 7 post-irradiation. (B) Left, Representative femurs stained with hematoxylin and eosin. Scale bar 100 μm. Right, total cells per femur.  $n = 6-10$  mice per group. \* $p = 0.02$ . (C) CFCs and CFU-S12.  $n = 5$  and  $4$  per group for CFCs and CFU-S12, respectively. \* $p = 0.02$  for CFCs.  $p > 0.05$  for CFU-S12. (D) Levels of LTC-ICs as shown.  $n = 6$  per group.  $p > 0.05$ . Student's t test (two-tailed with unequal variance) were used in these analyses.

**Figure S6**

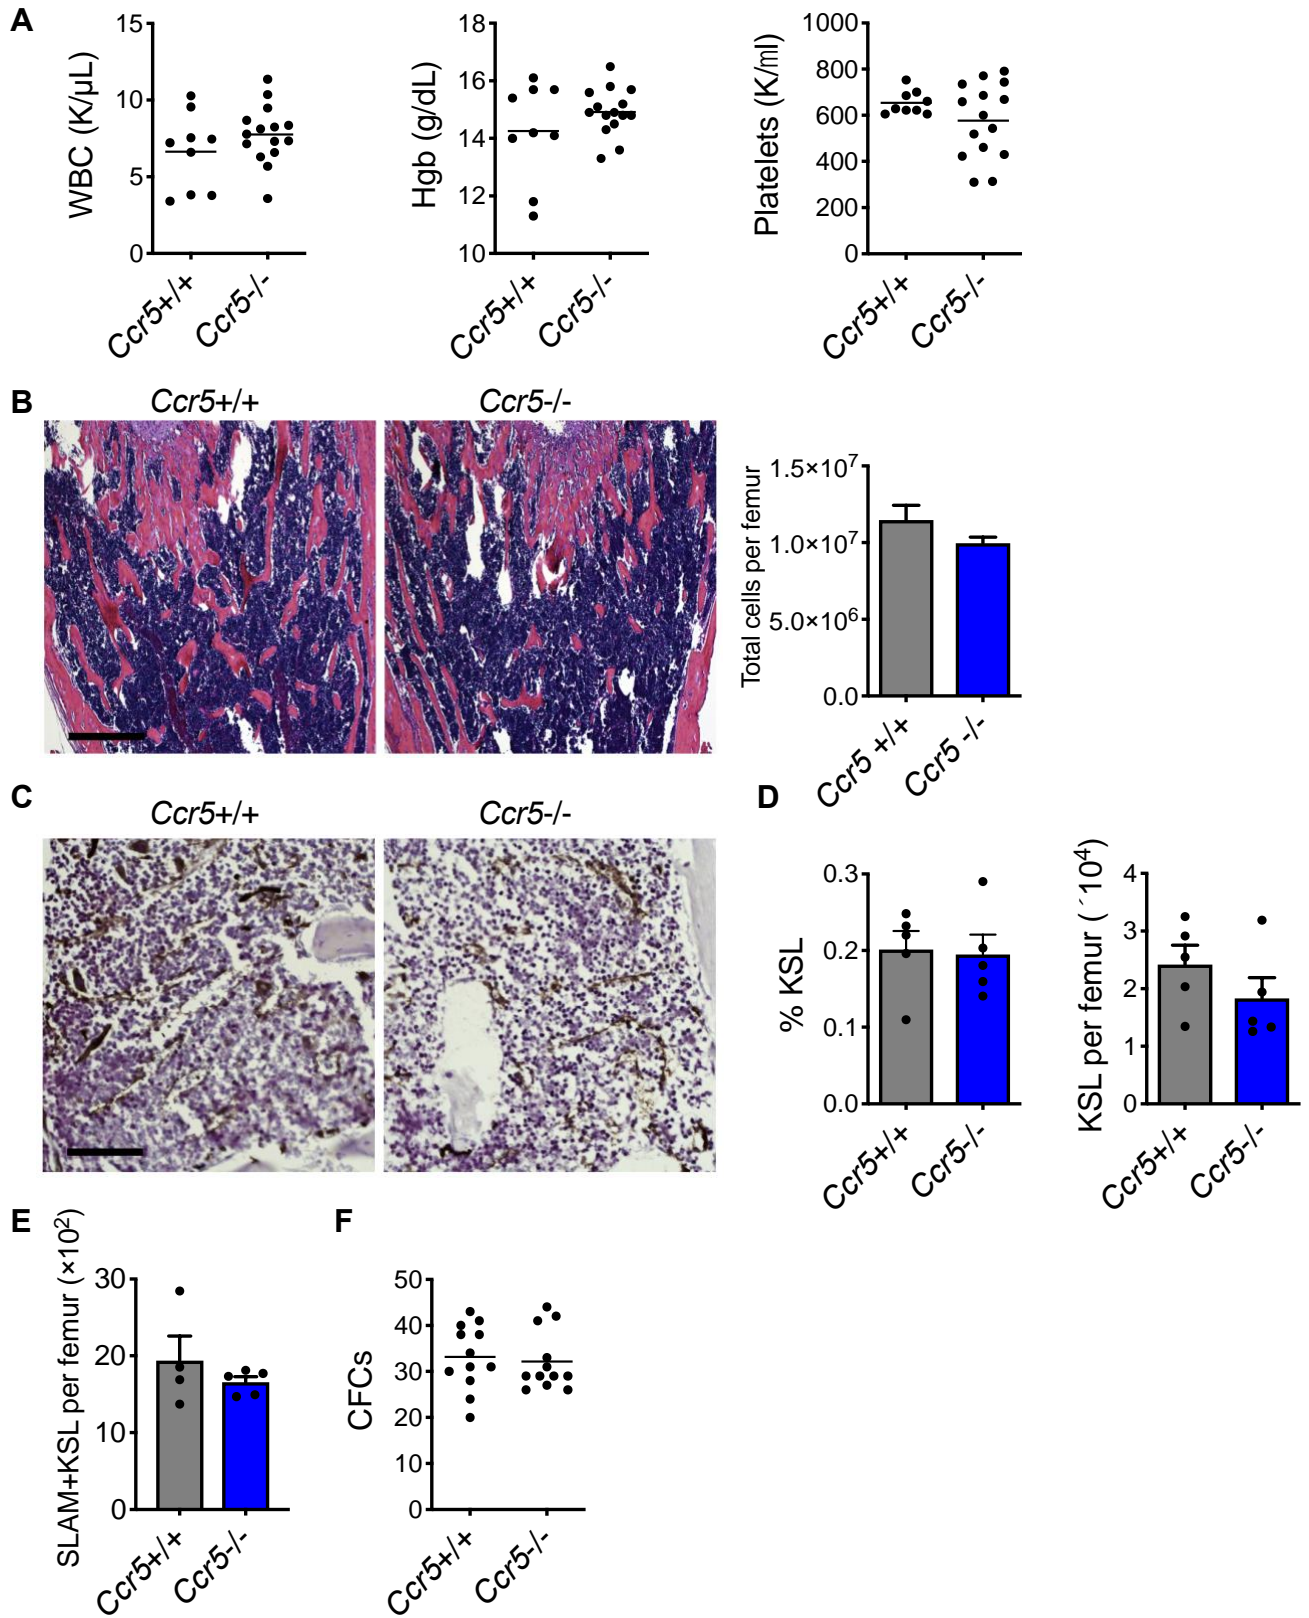



**Figure S6. Hematopoietic phenotype of non-irradiated *Ccr5*<sup>+/+</sup> and *Ccr5*<sup>-/-</sup> mice.** (A) White blood cell count (WBC), Hemoglobin (Hgb), and platelets are shown at baseline in indicated genotypes. *n*= 9-15 per group. (B) Left, representative femur sections stained with hematoxylin and eosin. Scale bar 100  $\mu$ m. Right, quantification of total cells per femur. *n*= 5 per group. (C) MECA-32 and hematoxylin-stained femur sections. Scale bar 100  $\mu$ m. (D) Percentage KSL and total KSL per femur. *n*= 5 per group. (E) Total SLAMF6<sup>+</sup>KSL cells per femur. *n*= 4-5 per group. (F) Total CFCs per  $1 \times 10^4$  cells. *n*= 12 per group. Student's t test (two-tailed with unequal variance) were used in these analyses. All comparisons were *p*> 0.05.

**Figure S7**

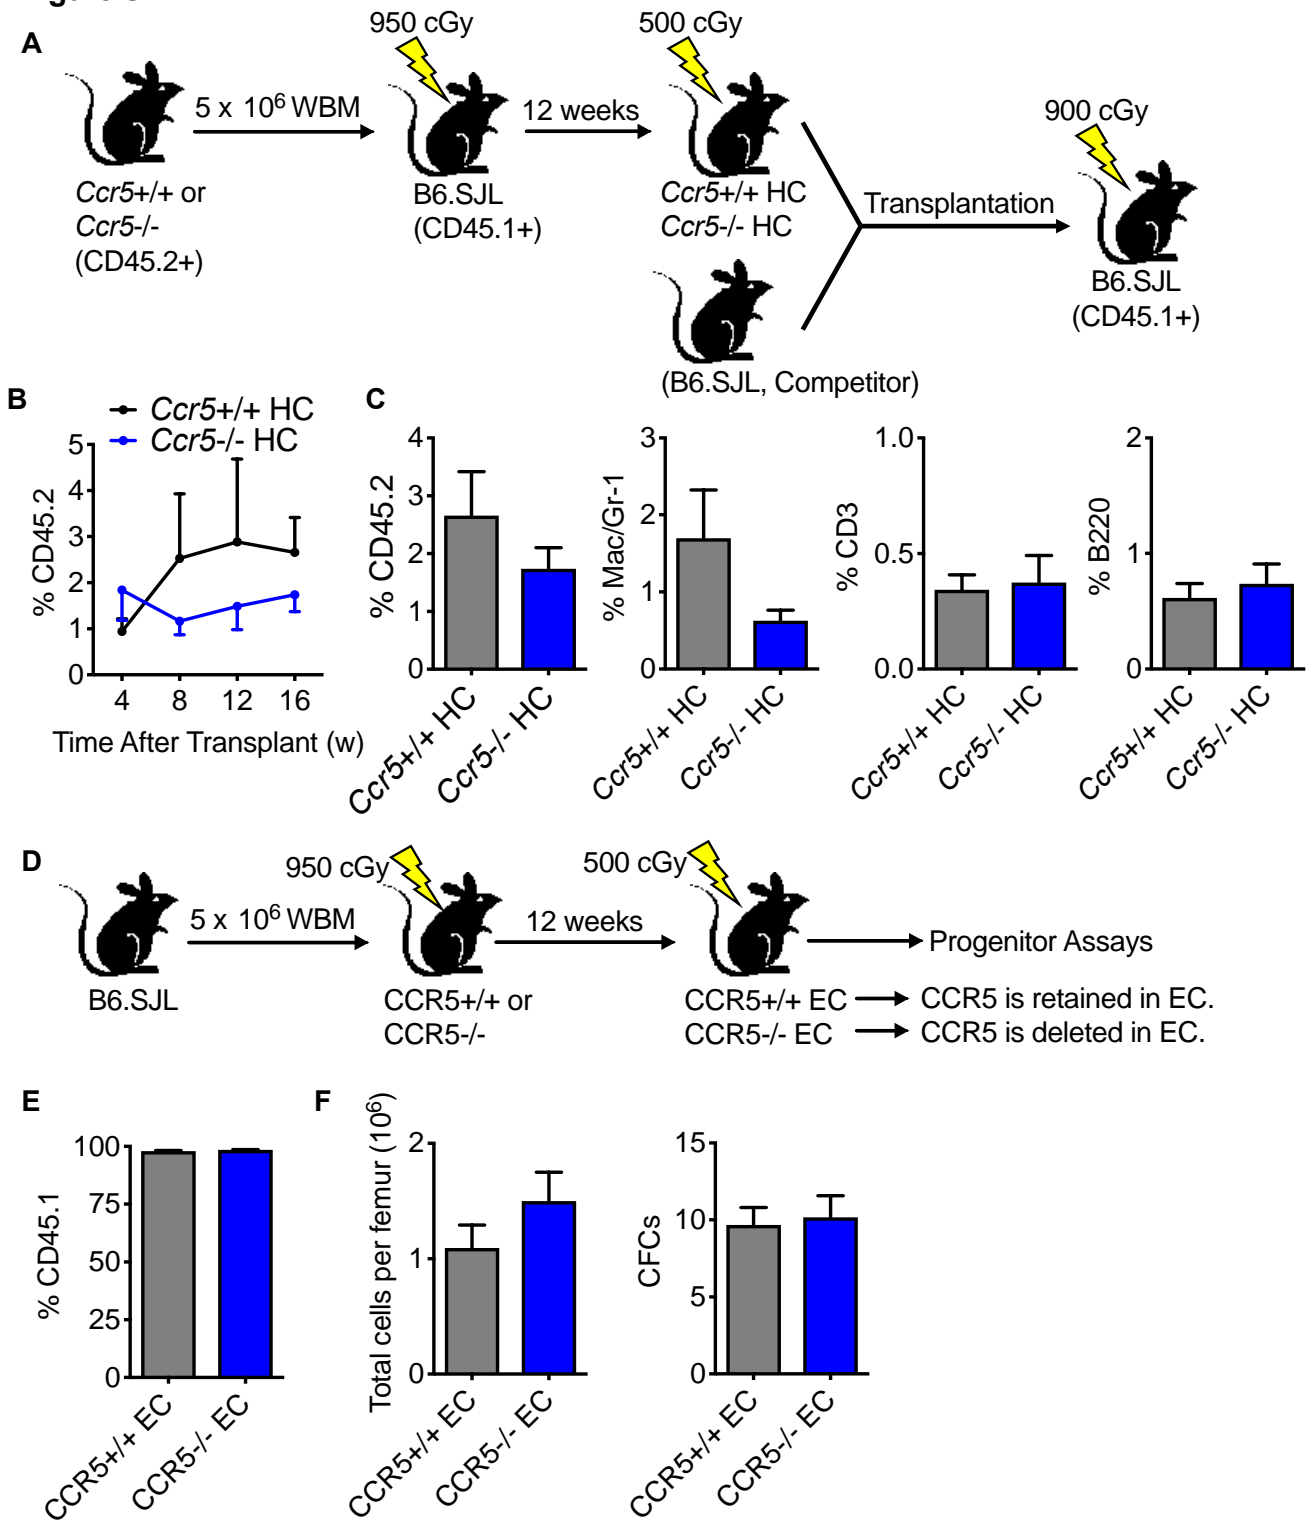

**Figure S7. Deletion of CCR5 in hematopoietic cells or in the marrow microenvironment. (A)**

Schematic diagram of study design. *Ccr5*<sup>-/-</sup> hematopoietic cell (HC) and *Ccr5*<sup>+/+</sup> HC control mice are

generated by transplanting  $5 \times 10^6$  donor cells from corresponding genotypes into B6.SJL recipients. At 12 weeks following transplantation, *Ccr5*<sup>-/-</sup> HC and controls are irradiated with 500 cGy. At day 7 following irradiation,  $10^6$  irradiated donor cells and  $2 \times 10^5$  competing host marrow cells are transplanted into irradiated recipient mice (B6.SJL). Peripheral blood engraftment is measured over time. **(B)** Total CD45.2 donor engraftment in the peripheral blood of recipients of *Ccr5*<sup>+/+</sup> (HC) or *Ccr5*<sup>-/-</sup> HC marrow on day 7 following 500 cGy.  $n= 7-8$  per group. **(C)** Total CD45.2+ peripheral blood donor engraftment and multi-lineage engraftment at 16 weeks post-transplantation. **(D)** Schematic diagram for the isolation of *Ccr5* deficiency in the marrow microenvironment. *Ccr5*<sup>+/+</sup> or *Ccr5*<sup>-/-</sup> mice were transplanted with WBM cells from B6.SJL mice following 950 cGy total body irradiation to generate *Ccr5*<sup>-/-</sup> EC mice, which bear a deficiency of *Ccr5* in endothelial cells and other cells within the marrow microenvironment, and also control *Ccr5*<sup>+/+</sup> EC mice, which retain *Ccr5*. At 12 weeks post-transplantation, mice were exposed to 500 cGy and hematopoietic response was determined. **(E)** RT-PCR analysis of peripheral blood donor chimerism of *Ccr5*<sup>+/+</sup> EC and *Ccr5*<sup>-/-</sup> EC mice.  $n= 12$  per group. **(F)** Total cells per femur and CFCs at day 7 following 500 cGy total body irradiation.  $n= 4-6$  per group. Student's t test (two-tailed with unequal variance) were used in these analyses. All comparisons were  $p > 0.05$ .
